# Supplementary material
Source: PubMed Central journal article supplement (PMC4040097)
Supplement: supp_nst053_scan-12-407.pdf [file supp_nst053_scan-12-407.pdf]

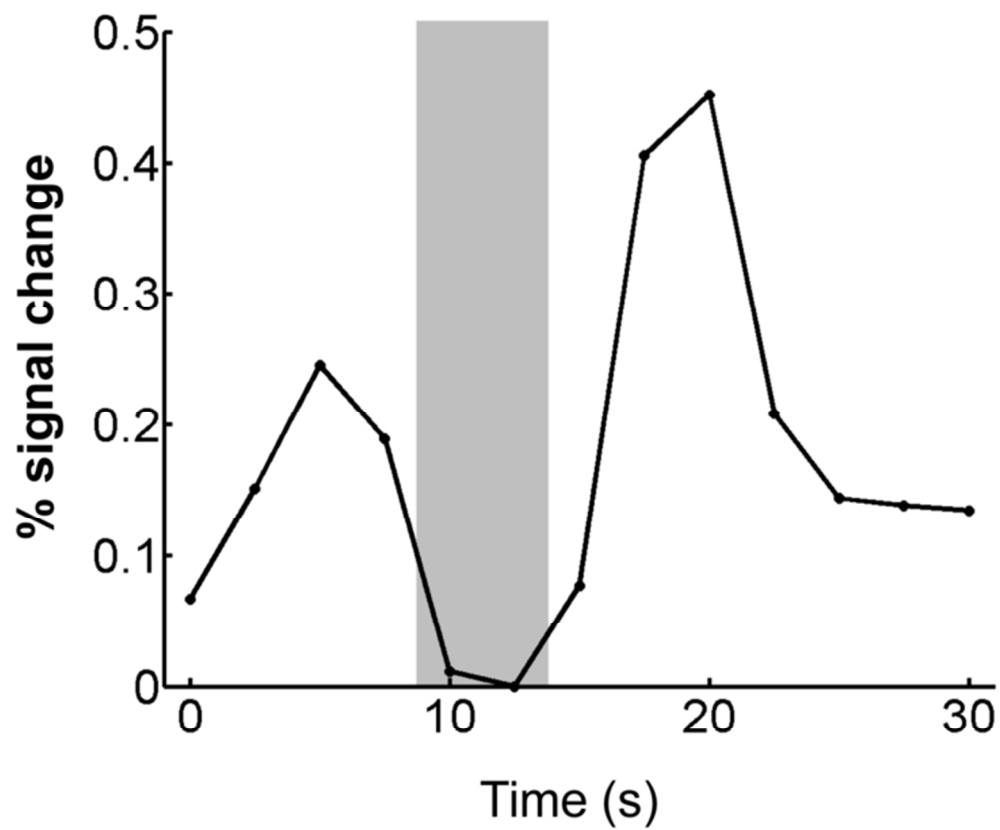

Figure S1. Responses in the visual cortex. Average estimated hemodynamic response (pooled over four conditions) from visual cortex ( $x = 38$ ,  $y = -50$ ,  $z = -17$ ) illustrating that activity at 10 and 12.5 sec post cue onset had minimal contribution from the transient cue phase.  
62x52mm (300 x 300 DPI)
